# Supplementary material
Source: publisher site journal article supplement (https://www.dovepress.com/article/255981)

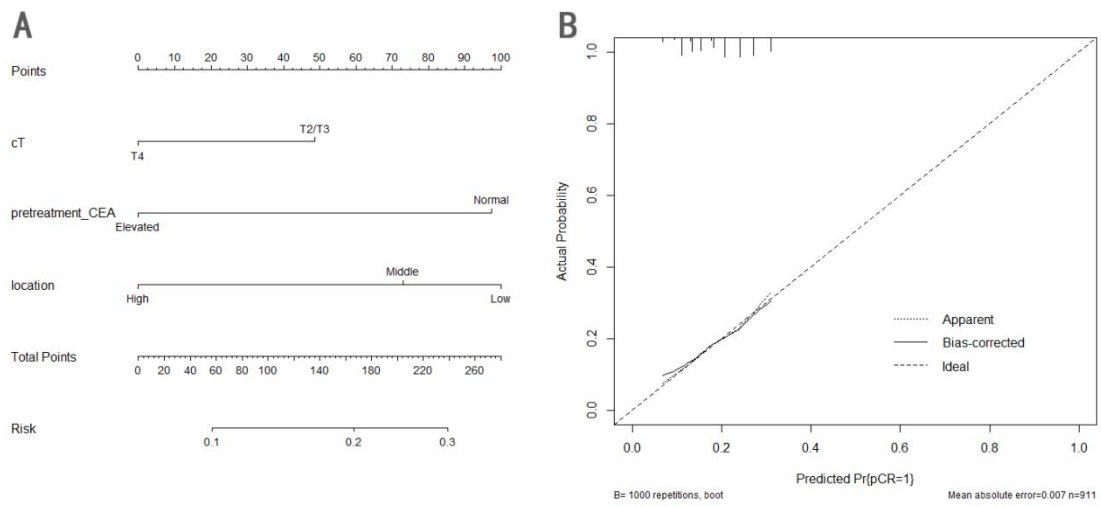

Figure S1. Nomogram and calibration curves for pCR

Supplement: Supplementary file 1 [file get_supplementary_file.php]
